# Supplementary material for: Does Food Intake of Australian Toddlers 12–24 Months Align with Recommendations: Findings from the Australian Feeding Infants and Toddlers Study (OzFITS) 2021
Source: Nutrients. 2022 Jul 14;14(14):2890. doi: 10.3390/nu14142890 (PMC9322480; doi:10.3390/nu14142890)
Supplement: Supplementary file 1 [file nutrients-14-02890-s001.zip › nutrients-1803227-supplementary.pdf]

**Table S1.** Daily serves of five food group and discretionary foods consumed by toddlers 12–<18 months stratified by breastmilk intake, OzFITS 2021.

| Food Group                                     | Consumers<br><i>n</i> (%) | AGHE Serve size <sup>1</sup> | Recommended serves per<br>day | Number of serves<br>per day <sup>2</sup> |
|------------------------------------------------|---------------------------|------------------------------|-------------------------------|------------------------------------------|
| <b>Breastfed toddlers (<i>n</i> = 119)</b>     |                           |                              |                               |                                          |
| Fruit                                          | 116 (97)                  | 150 g                        | ½                             | 0.88 (0.45–1.47)                         |
| Vegetables                                     | 118 (99)                  | 75 g                         | 2–3                           | 1.17 (0.54–2.23)                         |
| Cereals and grains                             | 115 (97)                  | 40 g bread                   | 4                             | 1.75 (0.87–2.56)                         |
| Meats and alternatives                         | 111 (93)                  | 65 g red meat                | 1                             | 0.52 (0.22–0.95)                         |
| Dairy                                          |                           |                              |                               |                                          |
| Without toddler milks                          | 107 (90)                  | 250 ml milk                  | 1–1 ½                         | 0.58 (0.21–1.21)                         |
| With toddler milks <sup>3</sup>                | 107 (90)                  | 250 ml milk                  | 1–1 ½                         | 0.60 (0.21–1.21)                         |
| Fats and oils                                  | 69 (58)                   | 7–10 g                       | 1                             | 0.15 (0–0.78)                            |
| Discretionary foods                            | 101 (85)                  | 418 kJ                       | 0                             | 0.73 (0.22–1.76)                         |
| <b>Non-breastfed toddlers (<i>n</i> = 114)</b> |                           |                              |                               |                                          |
| Fruit                                          | 108 (95)                  | 150 g                        | ½                             | 1.15 (0.69–1.63)                         |
| Vegetables                                     | 111 (97)                  | 75 g                         | 2–3                           | 1.55 (0.60–2.28)                         |
| Cereals and grains                             | 110 (96)                  | 40 g bread                   | 4                             | 2.21 (1.33–3.20)                         |
| Meats and alternatives                         | 102 (89)                  | 65 g red meat                | 1                             | 0.47 (0.18–1.01)                         |
| Dairy                                          |                           |                              |                               |                                          |
| Without toddler milks                          | 113 (99)                  | 250 mL milk                  | 1–1 ½                         | 1.56 (0.79–2.24)                         |
| With toddler milks <sup>3</sup>                | 114 (100)                 | 250 mL milk                  | 1–1 ½                         | 2.24 (1.55–2.96)                         |
| Fats and oils                                  | 67 (59)                   | 7–10 g                       | 1                             | 0.10 (0–0.51)                            |
| Discretionary foods                            | 100 (88)                  | 418 kJ                       | 0                             | 0.79 (0.20–2.04)                         |

<sup>1</sup> AGHE; Australian Guide to Healthy Eating; Equivalent of 40 g bread, 65 g red meat, or 250 ml milk. For example, 40g of cheese equals one serve of dairy [1]. <sup>2</sup> Values are median (IQR). The lower bound is used where a range exists for a recommended serves per day. <sup>3</sup> Dairy, including formula/toddler milk. A serve of formula/toddler milk is defined as 250 mL prepared volume. OzFITS, Australian Feeding Infants and Toddler Study.

**Table S2.** Energy and percentage total energy from five food group and discretionary foods for toddlers aged 12–<18 months stratified by breastmilk intake, OzFITS 2021.

| Food Group                                     | Consumers <i>n</i> (%) | Energy, kJ/day <sup>1</sup> | Percentage of total energy intake <sup>1</sup> |
|------------------------------------------------|------------------------|-----------------------------|------------------------------------------------|
| <b>Breastfed toddlers (<i>n</i> = 119)</b>     |                        |                             |                                                |
| Fruit                                          | 116 (97)               | 313 (138–524)               | 8 (4–13)                                       |
| Vegetables                                     | 118 (99)               | 151 (30–378)                | 4 (1–9)                                        |
| Cereals and grains                             | 115 (97)               | 654 (327–1057)              | 18 (10–25)                                     |
| Meats and alternatives                         | 111 (93)               | 286 (71–689)                | 8 (3–16)                                       |
| Dairy                                          |                        |                             |                                                |
| Without toddler milks                          | 107 (90)               | 417 (110–743)               | 11 (3–19)                                      |
| With toddler milks <sup>2</sup>                | 107 (90)               | 432 (110–792)               | 11 (3–21)                                      |
| Fats and oils                                  | 69 (58)                | 37 (0–185)                  | 1 (0–4)                                        |
| Discretionary foods                            | 101 (85)               | 290 (85–737)                | 8 (2–18)                                       |
| <b>Non-breastfed toddlers (<i>n</i> = 114)</b> |                        |                             |                                                |
| Fruit                                          | 108 (95)               | 405 (249–622)               | 10 (6–14)                                      |
| Vegetables                                     | 111 (97)               | 188 (58–464)                | 5 (1–11)                                       |
| Cereals and grains                             | 110 (96)               | 880 (514–1237)              | 22 (12–30)                                     |
| Meats and alternatives                         | 102 (89)               | 335 (59–750)                | 9 (2–17)                                       |
| Dairy                                          |                        |                             |                                                |
| Without toddler milks                          | 113 (99)               | 1065 (600–1517)             | 24 (15–38)                                     |
| With toddler milks <sup>2</sup>                | 114 (100)              | 1499 (1013–1896)            | 37 (24–49)                                     |
| Fats and oils                                  | 67 (59)                | 23 (0–139)                  | 1 (0–4)                                        |
| Discretionary foods                            | 100 (88)               | 331 (82–841)                | 9 (2–20)                                       |

<sup>1</sup> Values are median (IQR). <sup>2</sup> Dairy, including formula/toddler milk. A serve of formula/toddler milk is defined as 250 mL prepared volume.

**Table S3.** Daily serves of five food group and discretionary foods consumed by toddlers 18–24 months stratified by breastmilk intake, OzFITS 2021.

| Food Group                                     | Consumers<br><i>n</i> (%) | AGHE Serve size <sup>1</sup> | Recommended serves per<br>day | Number of serves<br>per day <sup>2</sup> |
|------------------------------------------------|---------------------------|------------------------------|-------------------------------|------------------------------------------|
| <b>Breastfed toddlers (<i>n</i> = 90)</b>      |                           |                              |                               |                                          |
| Fruit                                          | 86 (96)                   | 150 g                        | ½                             | 0.89 (0.48–1.62)                         |
| Vegetables                                     | 86 (96)                   | 75 g                         | 2–3                           | 1.08 (0.49–2.40)                         |
| Cereals and grains                             | 90 (100)                  | 40 g bread <sup>1</sup>      | 4                             | 2.01 (1.0–3.13)                          |
| Meats and alternatives                         | 82 (91)                   | 65 g red meat <sup>1</sup>   | 1                             | 0.55 (0.25–1.29)                         |
| Dairy                                          |                           |                              |                               |                                          |
| Without toddler milks                          | 83 (92)                   | 250 ml milk <sup>1</sup>     | 1–1 ½                         | 0.73 (0.42–1.42)                         |
| With toddler milks <sup>3</sup>                | 83 (92)                   | 250 ml milk <sup>1</sup>     | 1–1 ½                         | 0.76 (0.43–1.47)                         |
| Fats and oils                                  | 54 (60)                   | 7–10 g                       | 1                             | 0.24 (0–0.57)                            |
| Discretionary foods                            | 79 (88)                   | 418 kJ                       | 0                             | 1.37 (0.41–2.52)                         |
| <b>Non-breastfed toddlers (<i>n</i> = 152)</b> |                           |                              |                               |                                          |
| Fruit                                          | 147 (97)                  | 150 g                        | ½                             | 1.25 (0.58–1.85)                         |
| Vegetables                                     | 143 (94)                  | 75 g                         | 2–3                           | 1.22 (0.56–2.61)                         |
| Cereals and grains                             | 151 (99)                  | 40 g bread <sup>1</sup>      | 4                             | 2.54 (1.71–3.39)                         |
| Meats and alternatives                         | 137 (90)                  | 65 g red meat <sup>1</sup>   | 1                             | 0.62 (0.24–1.19)                         |
| Dairy                                          |                           |                              |                               |                                          |
| Without toddler milks                          | 147 (97)                  | 250 mL milk <sup>1</sup>     | 1–1 ½                         | 1.24 (0.85–1.93)                         |
| With toddler milks <sup>3</sup>                | 151 (99)                  | 250 mL milk <sup>1</sup>     | 1–1 ½                         | 1.66 (0.93–2.40)                         |
| Fats and oils                                  | 108 (71)                  | 7–10 g                       | 1                             | 0.31 (0–0.89)                            |
| Discretionary foods                            | 142 (93)                  | 418 kJ                       | 0                             | 1.51 (0.60–2.68)                         |

<sup>1</sup> AGHE; Australian Guide to Healthy Eating; Equivalent of 40 g bread, 65 g red meat, or 250 ml milk. For example, 40g of cheese equals one serve of dairy [1]. <sup>2</sup> Values are median (IQR). The lower bound is used where a range exists for a recommended serves per day. <sup>3</sup> Dairy, including formula/toddler milk. A serve of formula/toddler milk is defined as 250 mL prepared volume.

**Table S4.** Energy and percentage total energy from five food group and discretionary foods for toddlers 18–24 months stratified by breastmilk intake, OzFITS 2021.

| Food Group                                     | Consumers <i>n</i> (%) | Energy, kJ/day <sup>1</sup> | Percentage of total energy intake <sup>1</sup> |
|------------------------------------------------|------------------------|-----------------------------|------------------------------------------------|
| <b>Breastfed toddlers (<i>n</i> = 90)</b>      |                        |                             |                                                |
| Fruit                                          | 86 (96)                | 294 (158–557)               | 6 (4–12)                                       |
| Vegetables                                     | 86 (96)                | 146 (24–324)                | 3 (1–1)                                        |
| Cereals and grains                             | 90 (100)               | 836 (417–1394)              | 19 (10–31)                                     |
| Meats and alternatives                         | 82 (91)                | 500 (150–843)               | 11 (3–19)                                      |
| Dairy                                          |                        |                             |                                                |
| Without toddler milks                          | 83 (92)                | 520 (203–1004)              | 14 (6–23)                                      |
| With toddler milks <sup>2</sup>                | 83 (92)                | 520 (205–1021)              | 14 (6–24)                                      |
| Fats and oils                                  | 54 (60)                | 58 (0–148)                  | 1 (0–3)                                        |
| Discretionary foods                            | 79 (88)                | 575 (172–1056)              | 12 (4–25)                                      |
| <b>Non-breastfed toddlers (<i>n</i> = 152)</b> |                        |                             |                                                |
| Fruit                                          | 147 (97)               | 415 (209–645)               | 9 (5–14)                                       |
| Vegetables                                     | 143 (94)               | 185 (19–476)                | 4 (1–12)                                       |
| Cereals and grains                             | 151 (99)               | 1003 (620–1434)             | 23 (14–32)                                     |
| Meats and alternatives                         | 137 (90)               | 417 (122–858)               | 11 (3–20)                                      |
| Dairy                                          |                        |                             |                                                |
| Without toddler milks                          | 147 (97)               | 823 (470–1328)              | 20 (11–30)                                     |
| With toddler milks <sup>2</sup>                | 151 (99)               | 1129 (630–1562)             | 26 (16–37)                                     |
| Fats and oils                                  | 108 (71)               | 82 (0–218)                  | 2 (0–5)                                        |
| Discretionary foods                            | 142 (93)               | 633 (249–1121)              | 16 (6–26)                                      |

<sup>1</sup> Values are median (IQR). <sup>2</sup> Dairy, including formula/toddler milk. A serve of formula/toddler milk is defined as 250 mL prepared volume.
